# Supplementary material for: Observation and Characterization of Fragile Organometallic Molecules Encapsulated in Single‐Wall Carbon Nanotubes
Source: Hindawi journal article supplement (doi:10.1155/2014/539295), 2014-01-01
Supplement: f1 [file 539295.f1.pdf]

## Supplementary Figures

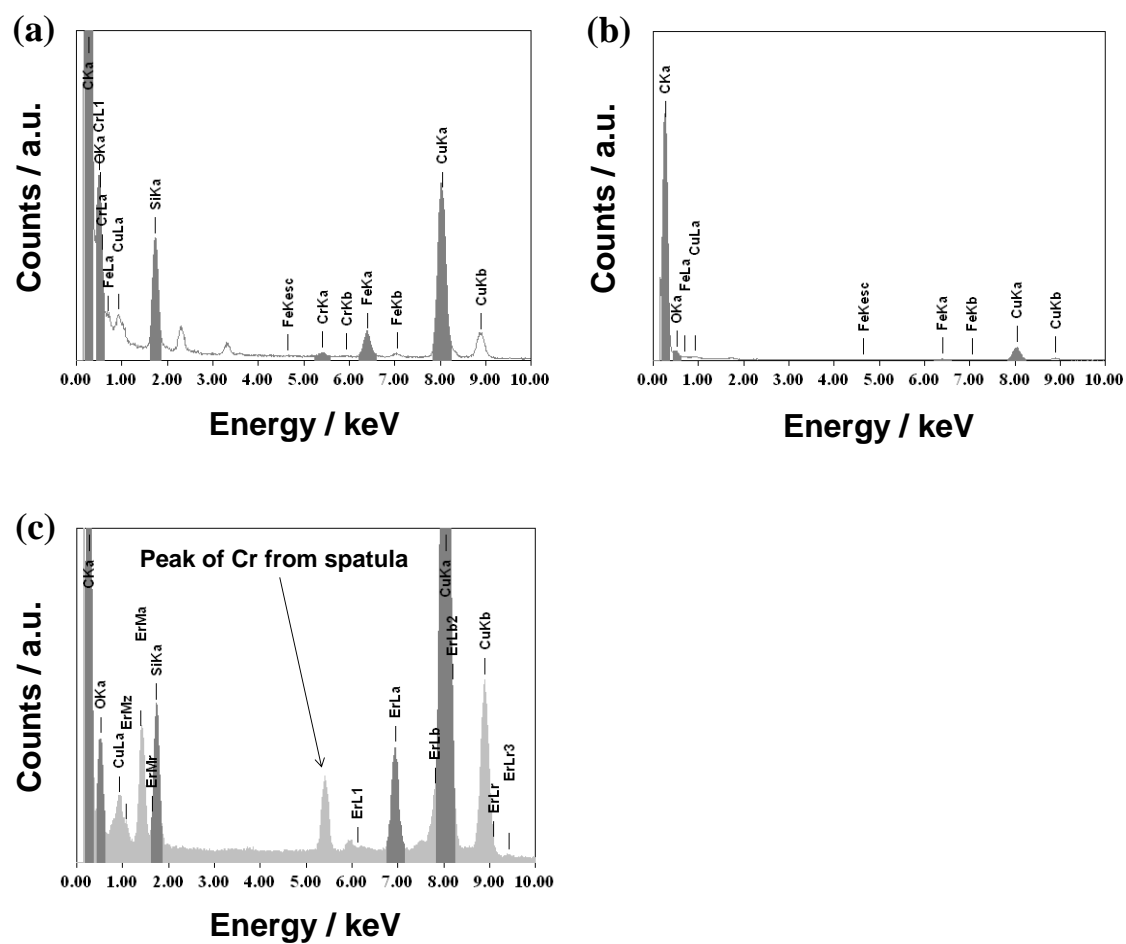

**Figure S1 | EDX spectra of (a) (10,0)SWBNNT, (b) Yb@(10,0) SWBNNT, and (c) ErCp<sub>3</sub>@p-SWCNT.**

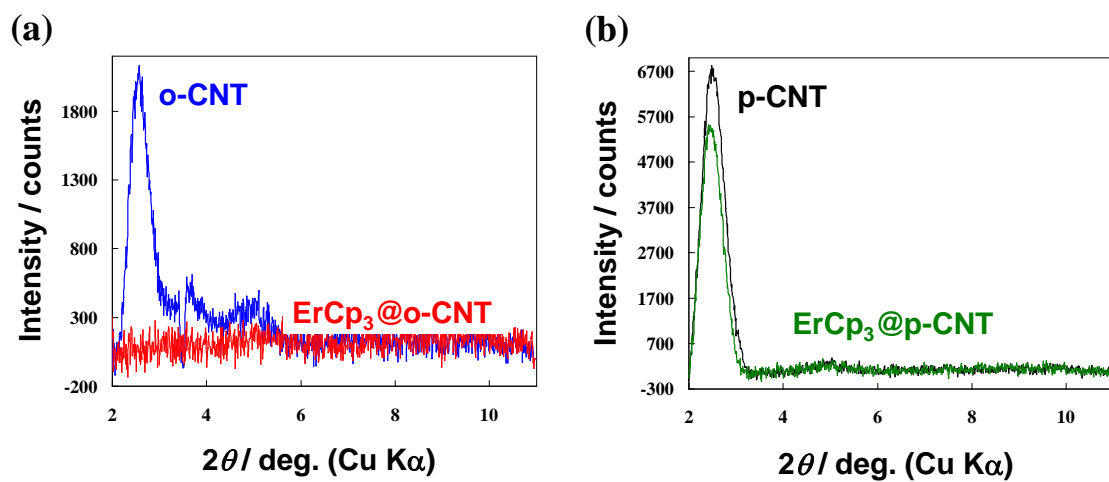

**Figure S2 | XRD patterns of (a) open-ended SWCNT (o-CNT) and ErCp<sub>3</sub>@o-CNT, and (b) close-ended SWCNT after purification (p-CNT) and ErCp<sub>3</sub>@p-CNT.**
